# Supplementary material
Source: publisher figshare collection journal article supplement (https://brill.figshare.com/articles/dataset/_/19486784)
Supplement: Supplementary file 1 [file 1]

**Putative white-naped mangabey (*Cercocebus lunulatus*) × olive baboon (*Papio anubis*) hybrids from Comoé National Park in Côte d'Ivoire**

Reiko Matsuda Goodwin<sup>a</sup>, Anh Galat-Luong<sup>b</sup> and Gérard Galat<sup>b</sup>

<sup>a</sup>Department of Sociology and Anthropology, Fordham University, New York, NY 10458-5045, USA

<sup>b</sup>Species Survival Commission, IUCN, 1196 Gland, Switzerland

\*Corresponding author; e-mail: matsudagoodw@fordham.edu

ORCID iDs : Matsuda Goodwin: 0000-0002-8731-4090; Galat-Luong: 0000-0003-3905-1932; Galat: 0000-0001-7073-960X

**Supplementary material**

Supplementary videos S1 and S2.
